# Supplementary material for: Enhancing the performance of transparent conductive oxide-less back contact dye-sensitized solar cells by facile diffusion of cobalt species through TiO2nanopores
Source: Royal Society of Chemistry journal article supplement (doi:10.1039/c6ra04894c), 2016-01-01
Supplement: c6ra04894c1.pdf [file c6ra04894c1.pdf]

## Supporting Information

Enhancing the Performance of Transparent Conductive Oxide-less Back Contact Dye-sensitized Solar Cells by Facile Diffusion of Cobalt Species through TiO<sub>2</sub> Nanopores

Md. Zaman Molla\*, Minobu Kawano, Ajay K. Baranwal, Shyam S. Pandey, Yuhei Ogomi, Tingli Ma and Shuzi Hayase\*

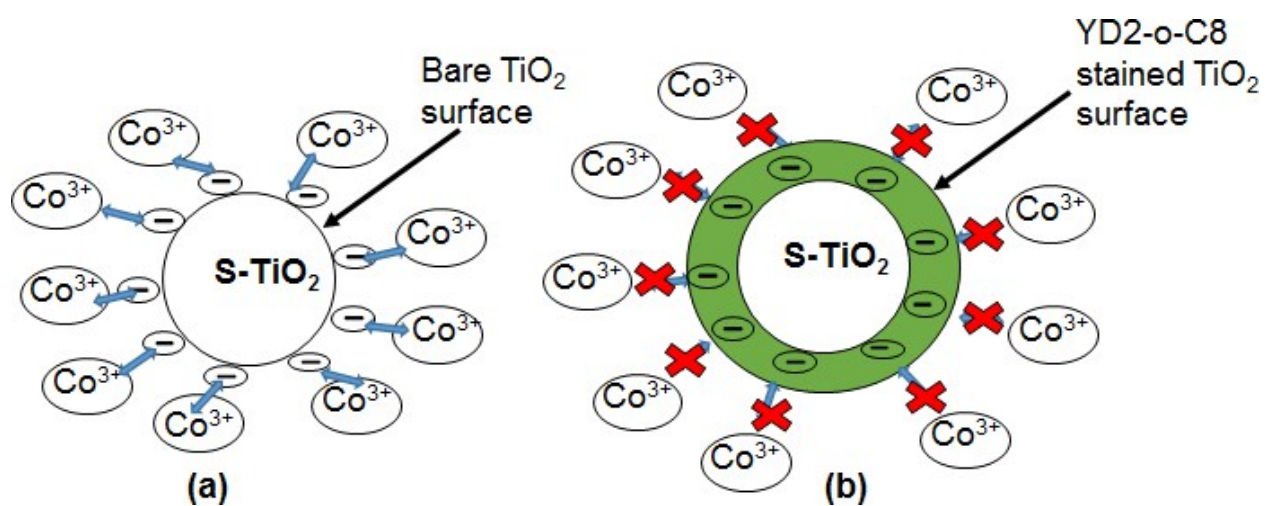

**Figure S1:** Schematic representation of (a) possible electrostatic interaction between the negatively charged bare TiO<sub>2</sub> surface and the oxidized Co<sup>3+</sup> species, and (b) suppression of the electrostatic interaction by staining the TiO<sub>2</sub> surface by YD2-o-C8 dye.

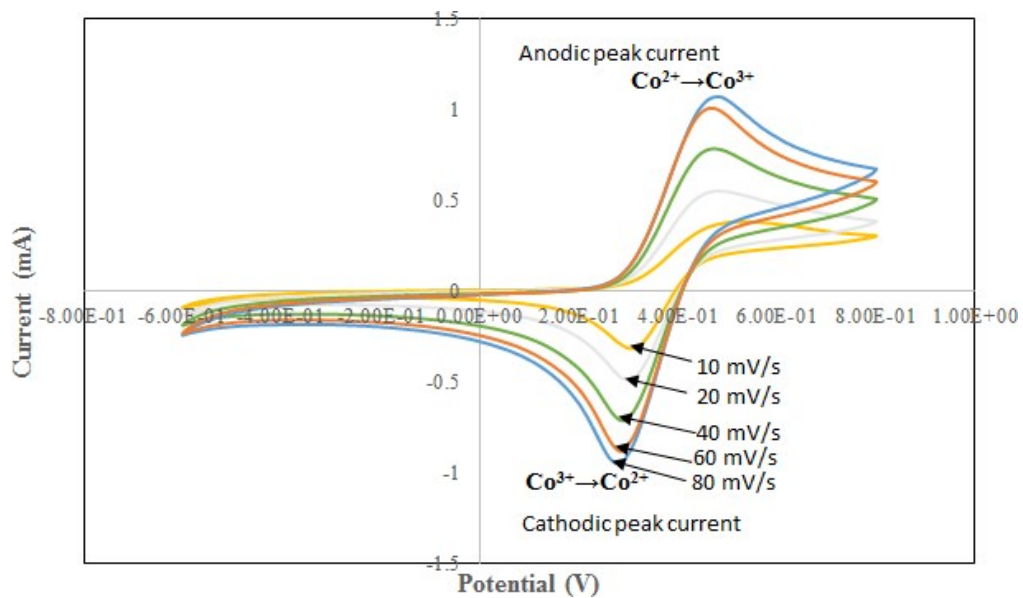

**Figure S2:** The cyclic voltammogram for 2.2 mM Co(bpy)<sub>3</sub>(PF<sub>6</sub>)<sub>2</sub> and 0.1 M TBAPF<sub>6</sub> in acetonitrile solution employing different scan rates of 10 mV/s, 20 mV/s, 40 mV/s, 60 mV/s, and 80 mV/s.

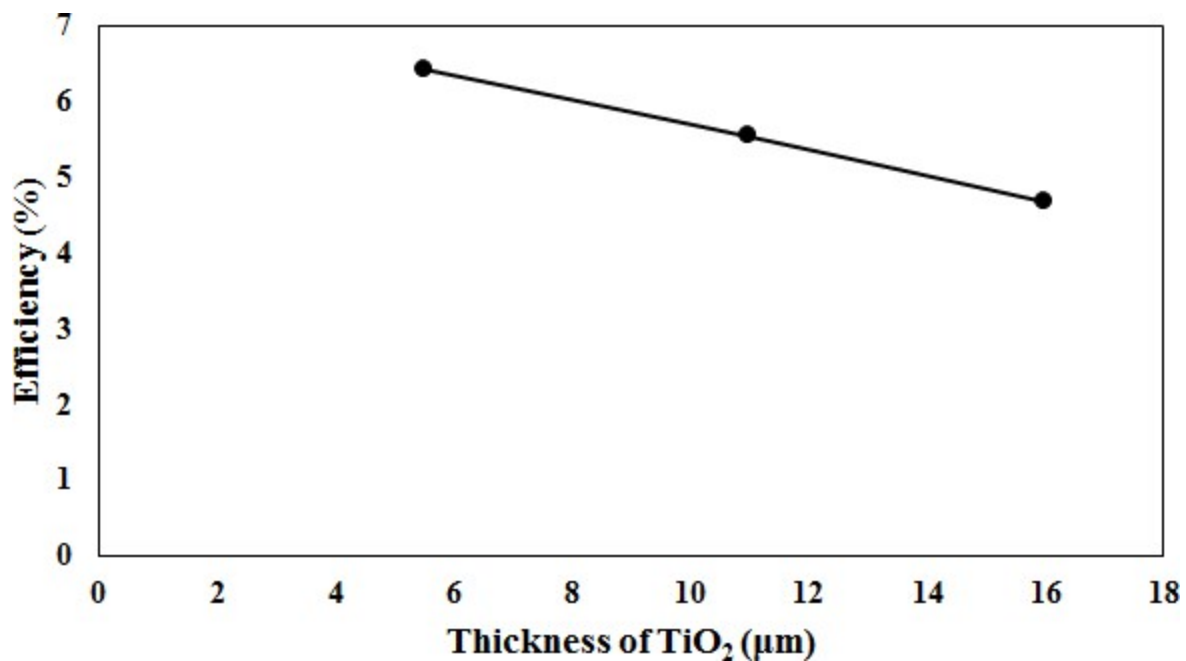

**Figure S3:** Relationship between photoconversion efficiency and thickness of nanoporous TiO<sub>2</sub> film stained with the YD2-o-C8 dye coated onto the Pt counter electrode.

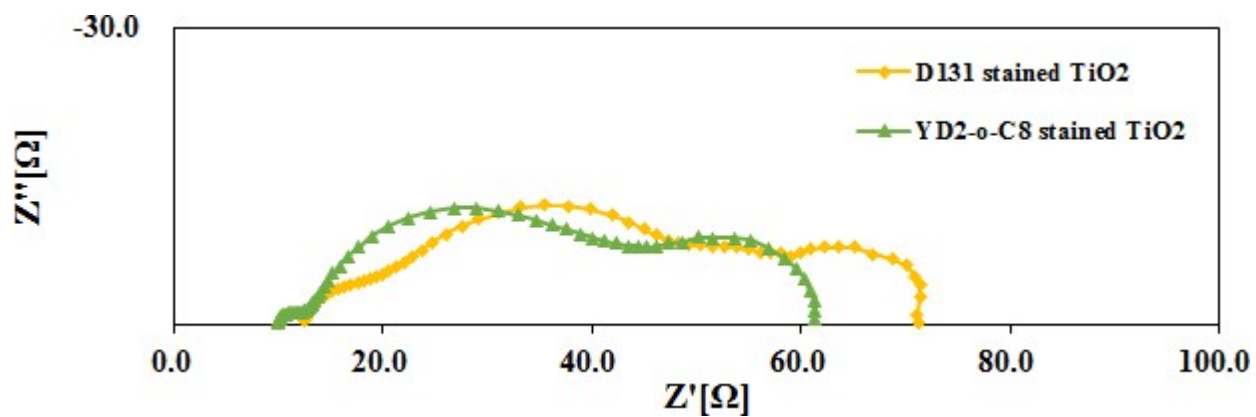

**Figure S4:** Nyquist plots for TCO-less BC-DSSCs with YD2-o-C8, and D131 stained nanoporous TiO<sub>2</sub> layer coated onto the Pt counter electrode used as an electrolyte absorber.

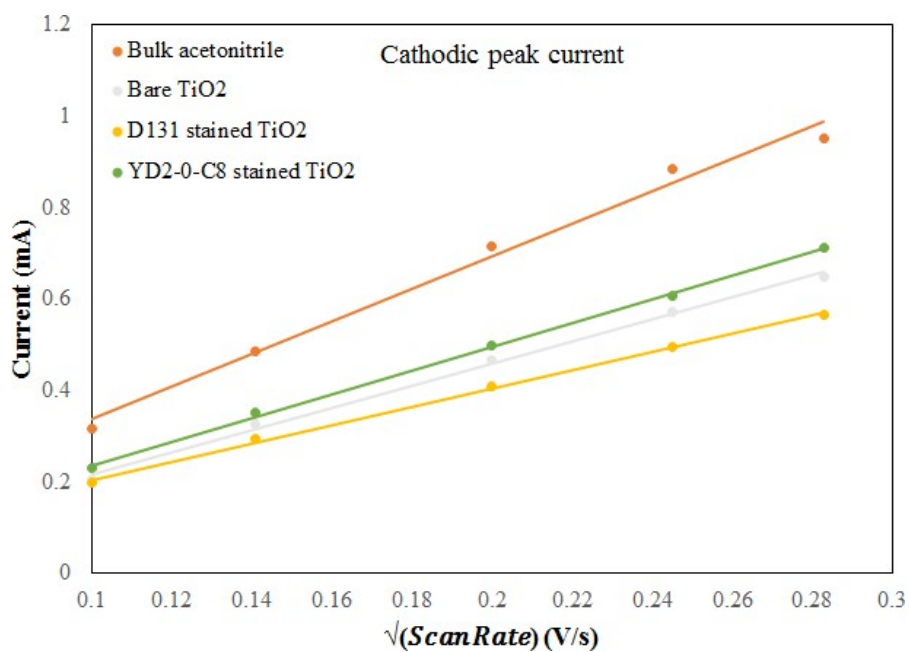

**Figure S5.** Cathodic peak current,  $i_p$  versus square root of scan rate,  $v^{1/2}$  graph in bulk acetonitrile and through YD2-o-C8 stained TN spacer, bare TN spacer, and D131 stained TN spacer measured at different scan rates of 10 mV/s, 20 mV/s, 40 mV/s, 60 mV/s, and 80 mV/s, respectively.

The diffusion coefficient was calculated using the Randles-Sevcik equation at 25°C

$$i_p = 2.68 \times 10^5 n^{3/2} AD^{1/2} C v^{1/2}$$

where  $i_p$  is the cathodic peak current,  $n$  the number of electrons transferred in the redox event,  $A$  the electrode area,  $D$  the diffusion coefficient,  $C$  the concentration of the redox specie and  $v$  the scan rate.

Table S1 Diffusion coefficient of  $[\text{Co}(\text{bpy})]^{3+}$  specie in bulk acetonitrile and through YD2-o-C8 stained TN spacer, bare TN spacer and D131 stained TN spacer.

| Diffusion medium                | Diffusion Coefficient                           |
|---------------------------------|-------------------------------------------------|
| Bulk acetonitrile               | $9.13 \times 10^{-6} \text{ cm}^2\text{s}^{-1}$ |
| YD2-o-C8 stained $\text{TiO}_2$ | $5.11 \times 10^{-6} \text{ cm}^2\text{s}^{-1}$ |
| Bare $\text{TiO}_2$             | $4.24 \times 10^{-6} \text{ cm}^2\text{s}^{-1}$ |
| D131 stained $\text{TiO}_2$     | $3.24 \times 10^{-6} \text{ cm}^2\text{s}^{-1}$ |
